# Supplementary material for: Laser-based machine vision and volume segmentation algorithm for equal weight portioning of poultry and fish
Source: PeerJ journal article supplement (doi:10.7717/peerj-cs.3377), 2025-11-28
Supplement: Code_and_Raw_data.zip [file Raw_data.xlsx]

## Sheet: Table1
Volume(mm^3)	V_i(mm^3)	n1	n2	n3	n4	n5	n6		Unit (mm^3)
115106	28776.5	28893.7	28821.6	28803.5	27867.2
111077	22215.4	22233.4	22283.7	22174.3	22133.3	21629.8
117012	19501.9	19535.9	19443	19513.9	19334.4	19554.6	19027.9

## Sheet: Table2,3
								Unit (grams, g.)
		n1	n2	n3	n4
	1	51.5	51.7	48.1	48.7
	2	52.2	50.8	47.7	49.3
	3	52.3	51.1	51	45.6
	4	51.2	51.9	50.9	46
	5	52.4	50.7	49.9	47
		n1	n2	n3	n4
	1	51.2	51.3	49	48.5
	2	51.6	51.5	48.1	48.8
	3	50.9	52.2	47.7	49.2
	4	50.5	51.6	48.9	49
	5	50.6	50.8	49.9	48.7
		n1	n2	n3	n4
	1	52.1	49.4	50.1	48.4
	2	51.7	49.7	50.3	48.3
	3	50.7	52.5	49.4	47.4
	4	53.2	49.9	49.1	47.8
	5	52.4	47.9	49.6	50.1
		n1	n2	n3	n4	n5
	1	40.4	39.5	41.6	39.7	38.8
	2	42.2	37.9	40	40.6	39.3
	3	40.4	38.4	41.3	40.3	39.6
	4	41	39.4	40.7	41	37.9
	5	39.9	39.6	39.5	41.6	39.4
		n1	n2	n3	n4	n5	n6
	1	34.3	33.3	35.3	33.1	32.3	31.7
	2	34.6	34.6	33.1	32.5	33.2	32
	3	36.4	34.8	33.4	32.9	31.7	30.8
	4	36.2	31.1	33.4	34.5	33.4	31.4
	5	35.4	32.4	34.2	33.7	33.1	31.2

## Sheet: Table4
	Position 1
	Position 2
	Position 3
Unit (grams, g.)
	100 g.	n1	n2	n3	n4		100 g.	n1	n2	n3	n4	n5		100 g.	n1	n2	n3	n4	n5	n6
	1	25.3	26	23.8	24.9		1	20.5	19.9	20.6	20.1	18.9		1	17.2	17.9	17	17.1	15.3	15.5
	2	25.2	26.4	24	24.4		2	20	19.4	20.1	20.6	19.9		2	16.6	16.9	17.3	17.4	16.3	15.5
	3	25.2	25.9	23.8	25.1		3	20.7	20	19.5	19.7	20.1		3	17.6	16.8	16.8	18.3	15.8	14.7
	4	24.6	26.1	23.8	25.5		4	20.1	20.2	21.1	19.6	19		4	16.1	17.3	16.6	16.9	16.2	16.9
	5	24.4	25.6	24.7	25.3		5	20.1	19.8	20.8	20	19.3		5	16.5	17.6	15.7	17.7	15.9	16.6
	6	25.1	26	25	23.9		6	20.4	19.9	20.6	19.8	19.3		6	16	17.9	16.2	17.3	16.1	16.5
	7	25.2	23.6	25.3	25.9		7	20.9	20.3	20.3	19.2	19.3		7	16.6	18	16	17.3	16	16.1
	8	24.5	26.1	24.6	24.8		8	20.9	20.6	19.3	19.9	19.3		8	16.8	16.9	15.6	16.8	16.7	17.2
	9	25.2	25.6	24.1	25.1		9	20	20.6	20	20.6	18.8		9	16.5	16.2	16.4	16.6	15.8	18.5
	150 g.	n1	n2	n3	n4		150 g.	n1	n2	n3	n4	n5		150 g.	n1	n2	n3	n4	n5	n6
	1	39.7	37.8	36.2	36.3		1	30.3	28.9	31	30.4	29.4		1	26.8	26.4	24.9	26	22.7	23.2
	2	38.8	38	35.4	37.8		2	32.1	30.3	30.2	29.2	28.2		2	27.7	26.1	23.1	23.3	23.9	25.9
	3	40.4	39.7	34.3	35.6		3	30.2	30.5	30.7	30.4	28.2		3	26.8	25.6	24.9	23.9	24.2	24.6
	4	38.7	39.2	35.2	36.9		4	32	29.3	30.8	29.4	28.5		4	26.4	26.8	24.8	24.5	23.8	23.7
	5	39.4	38.8	34.7	37.1		5	30.9	30.3	30.3	30	28.5		5	26.6	26.9	24.6	25.5	23	23.4
	6	39.7	38.8	35.1	36.4		6	31.4	29.8	30.4	29.6	28.8		6	27.5	25.1	25.6	23.9	23.2	24.7
	7	37.6	37.4	36	39		7	31.6	30.3	30.9	29	28.2		7	26.9	26.6	26.1	23.7	23.9	22.8
	8	39.7	38.9	35.4	36		8	30	30	30.6	30	29.4		8	26.8	26.8	24.1	23.8	24.5	24
	9	37.2	38.4	36.1	38.3		9	30.6	28.9	30.1	30.2	30.2		9	26.5	26.3	24.4	25.3	24.1	23.4
	200 g.	n1	n2	n3	n4		200 g.	n1	n2	n3	n4	n5		200 g.	n1	n2	n3	n4	n5	n6
	1	50.9	51.3	46.7	51.1		1	40.4	38.4	41.3	40.3	39.6		1	34.3	33.3	35.3	33.1	32.3	31.7
	2	51.2	51.3	49	48.5		2	40.4	39.5	41.6	39.7	38.8		2	33.7	33.4	34.6	33.1	33.3	31.9
	3	51.6	51.5	48.1	48.8		3	39.3	40.2	39.3	41	40.2		3	34.6	34.6	33.1	32.5	33.2	32
	4	50.9	52.2	47.7	49.2		4	39.2	42.1	37.8	39.6	41.3		4	36.4	34.8	33.4	32.9	31.7	30.8
	5	50.5	51.6	48.9	49		5	39.9	39.6	39.5	41.6	39.4		5	36.2	31.1	33.4	34.5	33.4	31.4
	6	52.7	51.1	50	46.2		6	42.2	37.9	40	40.6	39.3		6	35.4	32.4	34.2	33.7	33.1	31.2
	7	50.6	50.8	49.9	48.7		7	39.2	43.3	37.4	39.7	40.4		7	34.8	34.4	33	35.6	31.4	30.8
	8	52.4	50.7	50.2	46.7		8	40.7	40.9	38.9	40.7	38.8		8	35.7	33.9	33.8	33.7	31.9	31
	9	52.7	49.6	50.4	47.3		9	41.7	39.9	40.3	41.1	37		9	35.6	34	32.5	33.4	33	31.5

## Sheet: Table5
			Each piece weight(grams.)
	weight(g)	weight/n(g)	n1	n2	n3	n4	n5	n6	MAE	%MAE
Chicken 4	130.6	32.65	34.7	32.7	34.5	28.7			1.975	6.049	4.53215	mean
	157.8	39.45	38	42.1	41.2	36.5			2.2	5.57668	1.93252	sd
	198	49.5	52.5	46.5	51.2	47.8			2.35	4.74747	198	max W
	179.5	44.875	46.1	43.1	46	44.3			1.175	2.61838	120.5	min W
	129.1	32.275	32	34.6	32.2	30.3			1.1625	3.60186	7.6528	max%MAE
	138.5	34.625	35.2	35.1	32.7	35.5			0.9625	2.77978	1.45228	min%MAE
	194.7	48.675	52.4	52.4	44.9	45			3.725	7.6528
	162.9	40.725	40.9	44.2	40.2	37.6			1.825	4.48128
	161.9	40.475	44.3	41.8	39.4	36.4			2.575	6.36195
	120.5	30.125	29.7	29.9	29.9	31			0.4375	1.45228
Fish 4	60.1	15.025	14.6	14.7	14.8	16			0.4875	3.24459	3.62947	mean
	100.4	25.1	24.6	26	25.8	24			0.8	3.18725	0.695964	sd
	69.7	17.425	17.4	17	18.5	16.8			0.5375	3.08465	103.4	max W
	70	17.5	16.9	17.2	18.5	17.4			0.5	2.85714	51.8	min W
	58.7	14.675	16	14.4	14.1	14.2			0.6625	4.51448	4.59057	max%MAE
	64.5	16.125	16.9	16.3	16.5	14.8			0.6625	4.10853	2.7027	min%MAE
	103.4	25.85	28	25.3	25	25.1			1.075	4.15861
	80.6	20.15	22	20	19.5	19.1			0.925	4.59057
	89.7	22.425	23	22.7	23.3	20.7			0.8625	3.84615
	51.8	12.95	13	13.6	12.3	12.9			0.35	2.7027
fish 5	53.9	10.78	11.9	11	10.2	10.4	10.4		0.536	4.97217	4.12196	mean
	100.7	20.14	19.5	21.1	20.6	19	20.5		0.712	3.53525	0.86128	sd
	89	17.8	17	18.6	18.5	17.5	17.4		0.6	3.37079	105.7	max W
	61.1	12.22	11.6	13	12.8	11.5	12.2		0.544	4.45172	53.9	min W
	89.7	17.94	18	17.8	19.4	17.1	17.4		0.608	3.38907	5.33586	max%MAE
	105.7	21.14	19.4	23.7	21.4	20.8	20.4		1.128	5.33586	2.84946	min%MAE
	65.9	13.18	12.9	13.6	14.3	13	12.1		0.616	4.67375
	63.2	12.64	11.3	13.4	13.1	13	12.4		0.632	5
	70.3	14.06	14	14.5	14.9	13.9	13		0.512	3.64154
	74.4	14.88	15.4	15.2	14.3	14.4	15.1		0.424	2.84946
Chicken 5	88.1	17.62	18.6	19.5	16.5	16.5	17		1.144	6.49262	5.68826	mean
	166.6	33.32	32.5	35.6	31	31.2	36.3		2.104	6.31453	1.83112	sd
	211.4	42.28	42.4	40.8	41.2	43.5	43.5		1.024	2.42195	211.4	max W
	90.1	18.02	18.9	19.7	17.8	16.4	17.3		1.024	5.68257	88.1	min W
	115.3	23.06	23.4	23.9	21.9	24.1	22		0.888	3.85082	8.43106	max%MAE
	170.1	34.02	33.6	33.4	31.1	34.1	37.9		1.584	4.65608	2.42195	min%MAE
	141.1	28.22	29.7	31.3	26.8	26.2	27.1		1.824	6.4635
	176.8	35.36	40	37.7	33.6	32.7	32.8		2.792	7.89593
	126.2	25.24	25.4	30.4	21.8	24.6	24		2.128	8.43106
	116.4	23.28	23.1	23.2	22.3	26	21.8		1.088	4.67354
Fish 6	90.1	15.0167	14.5	16	15.3	14.8	15.4	14.1	0.55	3.6626	5.78255	mean
	115.8	19.3	18.4	21.5	20.7	17	20.2	18	1.5	7.77202	2.33755	sd
	76.4	12.7333	12.6	13.3	12.7	12	13.7	12.1	0.511111	4.01396	118.1	max W
	101	16.8333	15	18.1	15	19.2	18.5	15.2	1.76667	10.495	56.9	min W
	80.3	13.3833	13.9	14.3	12.5	13.6	13.6	12.4	0.622222	4.64923	10.495	max%MAE
	89.4	14.9	15.4	15.7	15.2	13.8	14.4	14.9	0.533333	3.57942	3.57942	min%MAE
	72	12	13.5	12.5	11.4	11.2	11	12.4	0.8	6.66667
	90.1	15.0167	15	16.1	13.6	15.4	14.7	15.3	0.583333	3.88457
	56.9	9.48333	9.4	10.5	8.6	10.5	8.2	9.7	0.75	7.90861
	118.1	19.6833	18.5	21.2	19.9	17.8	20.8	19.9	1.02222	5.19334
Chicken 6	122.9	20.4833	23.5	21.6	18.1	22.7	18.7	18.3	2.11667	10.3336	5.96142	mean
	140.8	23.4667	24.5	24.7	23.1	23.5	22.2	22.8	0.766667	3.26705	3.32722	sd
	155.6	25.9333	22.4	31	24.6	27.5	23.9	26.2	2.3	8.86889	180.6	max W
	180.6	30.1	30	32.1	29.5	30	29.3	29.7	0.666667	2.21484	82.9	min W
	150.3	25.05	23.6	29.1	22.3	28.7	21.1	25.5	2.71667	10.845	10.845	max%MAE
	174.4	29.0667	29.2	30	26.8	28.5	29.4	30.5	0.944444	3.24924	2.21484	min%MAE
	162.2	27.0333	28	27.3	27.5	27.6	25.5	26.3	0.755556	2.7949
	112.7	18.7833	19.1	21.1	17	20.2	18	17.3	1.35	7.18722
	82.9	13.8167	14.4	15.9	14.2	13.8	12	12.6	1.01667	7.35826
	129.7	21.6167	21.2	22.7	21.3	22.8	21.4	20.3	0.755556	3.49525
