# Supplementary material for: Laser-based machine vision and volume segmentation algorithm for equal weight portioning of poultry and fish
Source: PeerJ journal article supplement (doi:10.7717/peerj-cs.3377), 2025-11-28
Supplement: Table_1A.docx [file Table_1A.docx]

| **Source** | **DF** | **SS** | **MS** | **F-Value** | **P-Value** |
| --- | --- | --- | --- | --- | --- |
| Part | 8 | 8597.67 | 1074.71 | 1368.09 | 0.000 |
| Operator | 2 | 0.12 | 0.06 | 0.07 | 0.929 |
| Part * Operator | 16 | 12.57 | 0.79 | 1.46 | 0.149 |
| Repeatability | 54 | 29.02 | 0.54 |  |  |
| Total | 80 | 8639.38 |  |  |  |
