# Supplementary material for: Laser-based machine vision and volume segmentation algorithm for equal weight portioning of poultry and fish
Source: PeerJ journal article supplement (doi:10.7717/peerj-cs.3377), 2025-11-28
Supplement: Table_3A.docx [file Table_3A.docx]

| **Source** | **VarComp** | **% Contribution (VarComp)** | **StdDev (SD)** | **Study Var**  **(6 × SD)** | **%Study Var (%SV)** |
| --- | --- | --- | --- | --- | --- |
| Total Gage R&R | 0.834 | 0.73% | 0.9130 | 5.4780 | 8.53% |
| Repeatability | 0.834 | 0.73% | 0.9130 | 5.4780 | 8.53% |
| Reproducibility | 0.000 | 0.00% | 0.0000 | 0.0000 | 0.00% |
| Operator | 0.000 | 0.00% | 0.0000 | 0.0000 | 0.00% |
| Part-To-Part | 113.779 | 99.27% | 10.6667 | 65.0004 | 99.64% |
| Total Variation | 114.613 | 100.00% | 10.7057 | 65.2344 | 100.00% |
