# Supplementary material for: Laser-based machine vision and volume segmentation algorithm for equal weight portioning of poultry and fish
Source: PeerJ journal article supplement (doi:10.7717/peerj-cs.3377), 2025-11-28
Supplement: Table_4A.docx [file Table_4A.docx]

| **Source** | **VarComp** | **% Contribution (VarComp)** | **StdDev (SD)** | **Study Var**  **(6 × SD)** | **%Study Var (%SV)** |
| --- | --- | --- | --- | --- | --- |
| Total Gage R&R | 0.849 | 0.50% | 0.9215 | 5.5292 | 9.00% |
| Repeatability | 0.574 | 0.50% | 0.7577 | 4.5461 | 7.40% |
| Reproducibility | 0.275 | 0.00% | 0.5246 | 3.1474 | 5.12% |
| Operator | 0.000 | 0.00% | 0.0000 | 0.0000 | 0.00% |
| Operator*Part | 0.275 | 0.26% | 0.5246 | 3.1474 | 5.12% |
| Part-To-Part | 119.346 | 99.19% | 10.1970 | 61.1819 | 99.59% |
| Total Variation | 119.940 | 100.00% | 10.2385 | 61.4313 | 100.00% |
